# Supplementary material for: Enhancing Blockade of Plasmodium falciparum Erythrocyte Invasion: Assessing Combinations of Antibodies against PfRH5 and Other Merozoite Antigens
Source: PLoS Pathog. 2012 Nov 8;8(11):e1002991. doi: 10.1371/journal.ppat.1002991 (PMC3493472; doi:10.1371/journal.ppat.1002991)
Supplement: Dataset S1 — Output from CFCA model-fitting, including initial binding rates at low and high flow rates and QC ratios. (XLSX) [file ppat.1002991.s001.xlsx]

## Sheet: Sheet1
Replicate	Cycle#	Curve	Ligand	Sample	Dilution factor	Meas. Conc (µg/ml)	Calc. Conc (µg/ml)	Flow (µl/min)	Initial rate (RU/s)	QC ratio	Temp (°C)	MW (Da)	D (m²/s)	Blank used	Chi² (RU²)	SE (Meas. Conc)	Cycles	Blank subtr.	Fit status
1		Fc=2-1	AMA1	ADR1 2A71 IgG	100	0.182	18.2			0.594	37	150000	7.803e-11		0.032	0.00026	42 - 43	Yes	Completed
	Yes, 42							5	1.2					26
	Yes, 43							100	2.43					27
1		Fc=2-1	AMA1	ADR1 2B71 IgG	100	0.2928	29.28			0.591	37	150000	7.803e-11		0.029	0.0003	44 - 45	Yes	Completed
	Yes, 44							5	1.91					26
	Yes, 45							100	3.84					27
1		Fc=2-1	AMA1	ADR1 2C71 IgG	100	0.2586	25.86			0.574	37	150000	7.803e-11		0.032	0.00039	46 - 47	Yes	Completed
	Yes, 46							5	1.69					26
	Yes, 47							100	3.36					27
1		Fc=2-1	AMA1	ADR1 2D71 IgG	100	0.321	32.1			0.612	37	150000	7.803e-11		0.034	0.00023	48 - 49	Yes	Completed
	Yes, 48							5	2.16					26
	Yes, 49							100	4.43					27
1		Fc=2-1	AMA1	ADR4 2A71 IgG	100	0.3033	30.33			0.556	37	150000	7.803e-11		0.03	0.00037	50 - 51	Yes	Completed
	Yes, 50							5	1.97					26
	Yes, 51							100	3.85					27
2		Fc=2-1	AMA1	ADR1 2A71 IgG	100	0.197	19.7			0.63	37	150000	7.803e-11		0.035	0.00043	42 - 43	Yes	Completed
	Yes, 42							5	1.32					30
	Yes, 43							100	2.74					31
2		Fc=2-1	AMA1	ADR1 2B71 IgG	100	0.2893	28.93			0.638	37	150000	7.803e-11		0.034	0.00047	44 - 45	Yes	Completed
	Yes, 44							5	1.9					30
	Yes, 45							100	3.98					31
2		Fc=2-1	AMA1	ADR1 2C71 IgG	100	0.2527	25.27			0.62	37	150000	7.803e-11		0.038	0.00038	46 - 47	Yes	Completed
	Yes, 46							5	1.71					30
	Yes, 47							100	3.53					31
2		Fc=2-1	AMA1	ADR1 2D71 IgG	100	0.3346	33.46			0.642	37	150000	7.803e-11		0.033	0.00036	48 - 49	Yes	Completed
	Yes, 48							5	2.27					30
	Yes, 49							100	4.76					31
2		Fc=2-1	AMA1	ADR4 2A71 IgG	100	0.2917	29.17			0.597	37	150000	7.803e-11		0.03	0.00045	50 - 51	Yes	Completed
	Yes, 50							5	1.95					30
	Yes, 51							100	3.95					31
1		Fc=2-1	RH5	ADR2 4A71 IgG	100	0.4509	45.09			0.329	37	150000	7.803e-11		0.03	0.00047	32 - 33	Yes	Completed
	Yes, 32							5	2.18					28
	Yes, 33							100	3.4					29
1		Fc=2-1	RH5	ADR2 4B71 IgG	100	0.2795	27.95			0.266	37	150000	7.803e-11		0.032	0.0011	34 - 35	Yes	Completed
	Yes, 34							5	1.11					28
	Yes, 35							100	1.61					29
1		Fc=2-1	RH5	ADR4 1A71 IgG	100	0.6036	60.36			0.27	37	150000	7.803e-11		0.034	0.00084	36 - 37	Yes	Completed
	Yes, 36							5	2.53					28
	Yes, 37							100	3.7					29
1		Fc=2-1	RH5	ADR4 1B71 IgG	100	0.2708	27.08			0.355	37	150000	7.803e-11		0.035	0.00095	38 - 39	Yes	Completed
	Yes, 38							5	1.16					28
	Yes, 39							100	1.86					29
1		Fc=2-1	RH5	ADR4 1C71 IgG	100	0.4219	42.19			0.241	37	150000	7.803e-11		0.039	0.00075	40 - 41	Yes	Completed
	Yes, 40							5	1.71					28
	Yes, 41							100	2.42					29
2		Fc=2-1	RH5	ADR2 4A71 IgG	100	0.4349	43.49			0.349	37	150000	7.803e-11		0.031	0.00095	26 - 27	Yes	Completed
	Yes, 26							5	2.2					32
	Yes, 27							100	3.53					33
2		Fc=2-1	RH5	ADR2 4B71 IgG	100	0.2807	28.07			0.274	37	150000	7.803e-11		0.034	0.00087	34 - 35	Yes	Completed
	Yes, 34							5	1.15	1.46957				32
	Yes, 35							100	1.69					33
2		Fc=2-1	RH5	ADR4 1A71 IgG	100	0.6382	63.82			0.282	37	150000	7.803e-11		0.03	0.00092	36 - 37	Yes	Completed
	Yes, 36							5	2.72	1.48529				32
	Yes, 37							100	4.04					33
2		Fc=2-1	RH5	ADR4 1B71 IgG	100	0.2717	27.17			0.281	37	150000	7.803e-11		0.032	0.00084	38 - 39	Yes	Completed
	Yes, 38							5	1.27	1.48031				32
	Yes, 39							100	1.88					33
2		Fc=2-1	RH5	ADR4 1C71 IgG	100	0.4742	47.42			0.254	37	150000	7.803e-11		0.03	0.0016	40 - 41	Yes	Completed
	Yes, 40							5	1.93	1.43523				32
	Yes, 41							100	2.77					33
